# Supplementary material for: Survival after Invasive Pulmonary Aspergillosis in a patient requiring sequential Veno- Arterial and Veno-Venous ECMO for refractory cardiorespiratory failure: a case report
Source: Research Square preprint supplement (doi:10.21203/rs.3.rs-7840777/v1), 2025-11-28
Supplement: Supplementary file 1 [file 1653d290aa299fbd8d389c7a.docx]

### **CARE Checklist for Case Report Submission**

Manuscript ID: 03a5d21b-54fd-42a8-8b70-6b90b5d7931b

Manuscript Title: Survival after Aspergillus terreus pneumonia in a patient requiring sequential Veno-Arterial and Veno-Venous ECMO for refractory cardiorespiratory failure: a case report

| **Section** | **Item** | **Description** | **Location (Line Number)** |
| --- | --- | --- | --- |
| **Title** | 1 | The words "case report" are in the title. | **Line 1** |
| **Key Words** | 2 | Key words identifying diagnoses and interventions. | **Lines 14-15** |
| **Abstract** | 3a | Introduction: What is unique about this case? | **Lines 20-22** |
|  | 3b | Case Presentation: Summary of case findings, interventions, and outcomes. | **Lines 24-34** |
|  | 3c | Conclusion: What are the main lessons learned? | **Lines 36-41** |
| **Introduction** | 4 | Brief introduction on the context of the condition (IPA, CAPA, ECMO). | **Lines 47-63** |
| **Case Presentation** | 5 | Patient Information: Demographics, medical history, baseline. | **Lines 67-70** |
|  | 6 | Clinical Findings: Presenting findings on ICU admission. | **Lines 74-81** |
|  | 7 | **Timeline:** Key dates and time points of the case evolution. | **Lines 75, 85, 93, 98, 105, 122** |
|  | 8a | **Diagnostic Assessment:** Hemodynamic findings (Pulmonary Artery Catheter). | **Lines 82-84** |
|  | 8b | **Diagnostic Assessment:** Microbiological/Biomarker findings (GM, *A. terreus*, CMV). | **Lines 107-120** |
|  | 8c | **Diagnostic Assessment:** Imaging findings (Chest CT). | **Lines 113-115** |
|  | 9 | **Therapeutic Intervention:** Description of all interventions (ECMO-VA, ECMO-VV, Voriconazole, Isavuconazole, Ganciclovir). | **Lines 85, 99, 122-126** |
|  | 10 | **Follow-up and Outcomes:** Describes the follow-up, final outcome, and complications (GIB, myopathy). | **Lines 128-135** |
| **Discussion** | 11a | Discussion of strengths and limitations of the case management (Self-Critical Analysis). | **Lines 139-183** (Specifically **Lines 171-183** for limitations) |
|  | 11b | Discussion of the case in the context of the scientific literature. | **Lines 139-183** (Citations [1-11]) |
|  | 11c | Justification for the conclusions (lessons learned). | **Lines 185-192** |
| **Patient Perspective** | 12 | The patient’s perspective on their care and outcome. | **N/A** *(This information was not included in the manuscript)* |
| **Consent** | 13 | Statement that the patient provided informed consent for publication. | **Lines 207-209** |
